# Supplementary material for: Efficient use of the NAR-1 pneumatic nebulizer in plasma spectrometry at sub-milliliter liquid consumption rates
Source: Royal Society of Chemistry journal article supplement (doi:10.1039/b803613f), 2008-01-01
Supplement: b803613f.pdf [file b803613f.pdf]

Table 1. Nebulizers, ICP-OES and MIP-OES operating conditions

|                                         | Integra XL | JY 138 | MIP 750 MV |
|-----------------------------------------|------------|--------|------------|
| Incident power / W                      | 1300       | 1000   | 300        |
| Argon flow rates / L min <sup>-1</sup>  |            |        |            |
| - nebulizer gas                         | 0.6        | 0.35   | 0.4        |
| - auxiliary gas                         | 0.4        | 0.15   | -          |
| - plasma gas                            | 10.0       | 12.0   | -          |
| Sample flow rate / ml min <sup>-1</sup> |            |        |            |
| - concentric nebulizer                  | 1.5        | 1.0    | 1.0        |
| - NAR-1 nebulizer                       | 0.2        | 0.1    | 0.1        |
| Integration time / s                    | 0.5        | 0.5    | 0.5        |

| Element | Wavelength / nm      |
|---------|----------------------|
| Al (I)  | 396.15               |
| Cd (I)  | 228.80               |
| Cd (II) | 226.50               |
| Mg (I)  | 285.21               |
| Mg (II) | 279.55               |
| Zn (I)  | 213.86               |
| Zn (II) | 202.55               |
| Cu (I)  | 324.75               |
| Cu (II) | 224.70               |
| Mn (II) | 257.61               |
| Fe (II) | 238.20               |
| Hg (I)  | 253.65               |
| Ni (I)  | 232.00               |
| Mg (II) | 280.20 (for Mg test) |

Table 2. Comparison of analytical performance of NAR-1 and CCN by Integra XL ICP-OES (robust conditions)

| Element | SBR   |      | RSD (%) |     | BEC (ppm) |       |
|---------|-------|------|---------|-----|-----------|-------|
|         | NAR-1 | CCN  | NAR-1   | CCN | NAR-1     | CCN   |
| Al (I)  | 20.2  | 12.4 | 1.7     | 0.9 | 1.1       | 1.6   |
| Cd (I)  | 38    | 46   | 1.1     | 1.8 | 0.03      | 0.04  |
| Cd (II) | 26    | 45   | 0.64    | 1.2 | 0.03      | 0.04  |
| Mg (I)  | 30    | 20   | 0.8     | 0.5 | 0.03      | 0.05  |
| Mg (II) | 156   | 98   | 1.4     | 0.9 | 0.006     | 0.01  |
| Zn (I)  | 435   | 52.5 | 1.9     | 2.0 | 0.004     | 0.04  |
| Zn (II) | 200   | 150  | 1.0     | 0.8 | 0.004     | 0.01  |
| Cu (I)  | 85    | 29   | 1.8     | 2.4 | 0.12      | 0.35  |
| Cu (II) | 40    | 41   | 1.9     | 1.5 | 0.24      | 0.24  |
| Mn (II) | 67    | 131  | 2.5     | 3.0 | 0.01      | 0.008 |
| Fe (II) | 44    | 90   | 1.6     | 2.2 | 0.1       | 0.04  |

Table 3. Comparison of analytical performance of NAR-1 and TR50C1 nebulizers by JY 138 ICP-OES

| Element | Concentric                |         | NAR-1                     |         |
|---------|---------------------------|---------|---------------------------|---------|
|         | DL [ng mL <sup>-1</sup> ] | RSD [%] | DL [ng mL <sup>-1</sup> ] | RSD [%] |
| Zn (I)  | 0.81                      | 1.9     | 0.33                      | 0.5     |
| Cd (I)  | 0.48                      | 16.9    | 0.55                      | 3.4     |
| Fe (II) | 1.24                      | 9.5     | 0.32                      | 1.8     |
| Mg (II) | 0.29                      | 2.4     | 0.35                      | 3.9     |
| Cu (I)  | 1.01                      | 4.7     | 0.92                      | 1.5     |

Table 4. Comparison of detection limits [ $\text{ng ml}^{-1}$ ] by NAR-1 and MCA nebulizers by MIP-OES

| Element | NAR-1 (this work) | MCA (this work) | NAR-1 [8] |
|---------|-------------------|-----------------|-----------|
| Cd (I)  | 11                | 9               | 28*       |
| Cu (I)  | 10                | 20              | 8         |
| Fe (II) | 51                | 87              | 62        |
| Hg (I)  | 32                | 45              | -         |
| Mn (II) | 6                 | 30              | 6         |
| Ni (I)  | 49                | 95              | -         |
| Zn (I)  | 8                 | 15              | 8         |

\* - for Cd (II)

Tab.5. Stoichiometric analysis of nanocrystalline Li/Mn spinels by MIP-OES

| Nominal composition $x$<br>in $\text{Li}_{1+x}\text{Mn}_{2-x}\text{O}_4$ | Total Mn content (mol/formula) |              | Effective $x$ in spinel<br>phase |
|--------------------------------------------------------------------------|--------------------------------|--------------|----------------------------------|
|                                                                          | nominal                        | experimental |                                  |
| 0                                                                        | 2.0                            | 1.98         | $0.00 \pm 0.03$                  |
| 0.05                                                                     | 1.95                           | 1.94         | $0.05 \pm 0.03$                  |
| 0.10                                                                     | 1.90                           | 1.86         | $0.17 \pm 0.03$                  |
| 0.15                                                                     | 1.85                           | 1.82         | $0.20 \pm 0.03$                  |
| 0.20                                                                     | 1.80                           | 1.77         | $0.23 \pm 0.03$                  |
| 0.25                                                                     | 1.75                           | 1.77         | $0.23 \pm 0.03$                  |
| 0.30                                                                     | 1.70                           | 1.72         | $0.28 \pm 0.03$                  |
| 0.33                                                                     | 1.67                           | 1.65         | $0.38 \pm 0.04$                  |

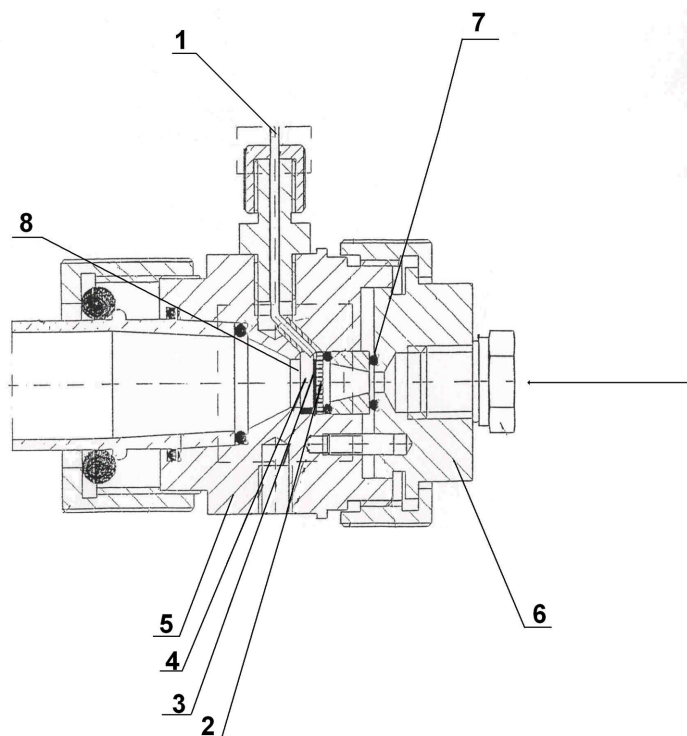

Fig. 1. The NAR-1 design

- 1 – analyte inlet
- 2 – microcapillary array plate
- 3 – sheet silicone seal
- 4 – alumina mask with interchangeable slit width
- 5,6 – nebulizer body
- 7 – silicone o-rings

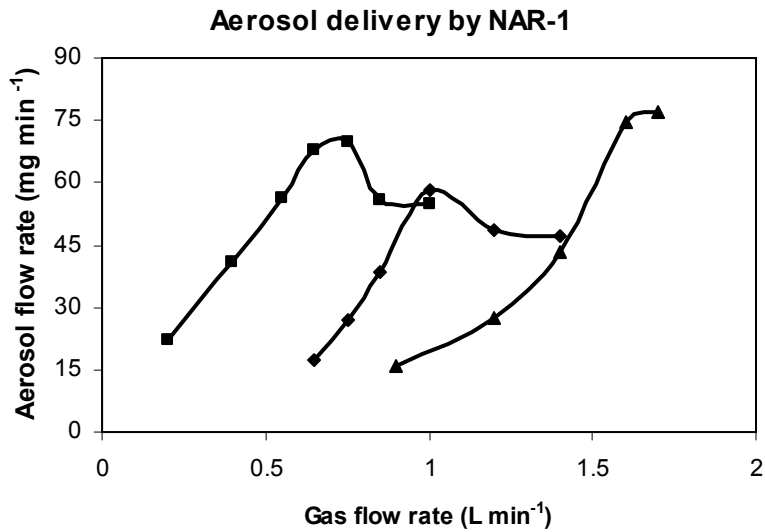

- - argon plasma
- ◆ - air plasma
- ▲ - helium plasma

Fig. 2. The effect of nebulizer gas flow rate for argon, air and helium on aerosol flow rate produced by NAR-1 at 0.2 ml min<sup>-1</sup> water consumption rate.

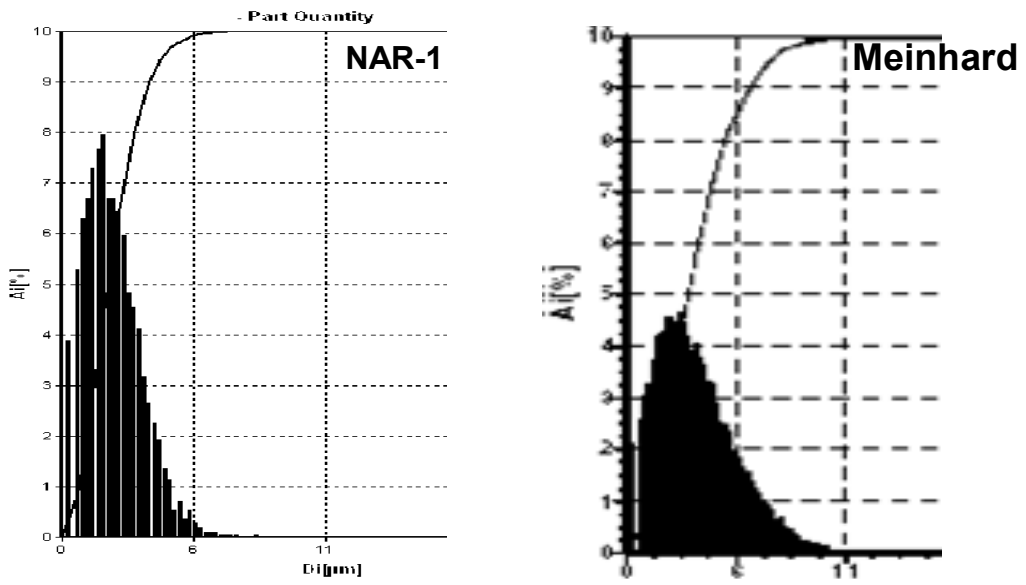

Fig. 3. The drop size distribution of tertiary aerosol obtained by NAR-1 and Meinhard nebulizers.



a)

### Integra XL ICP-OES

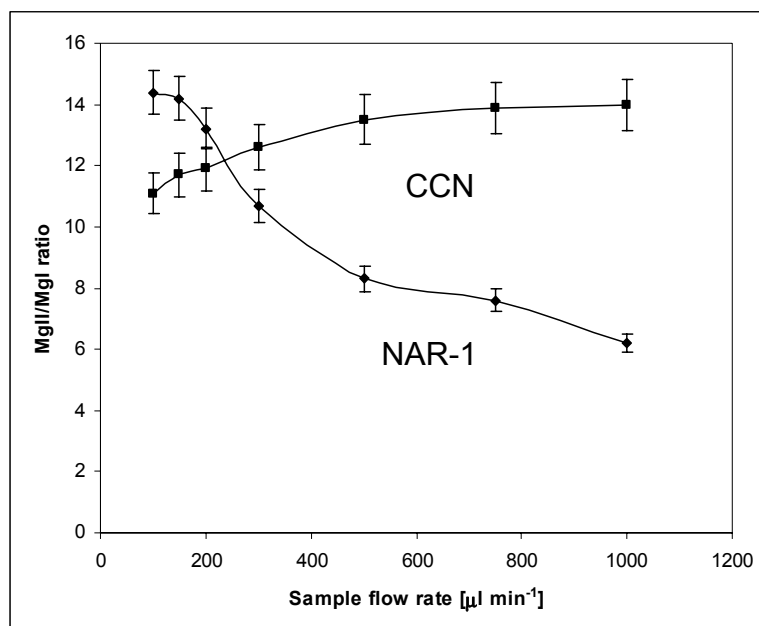

b)

### JY 138

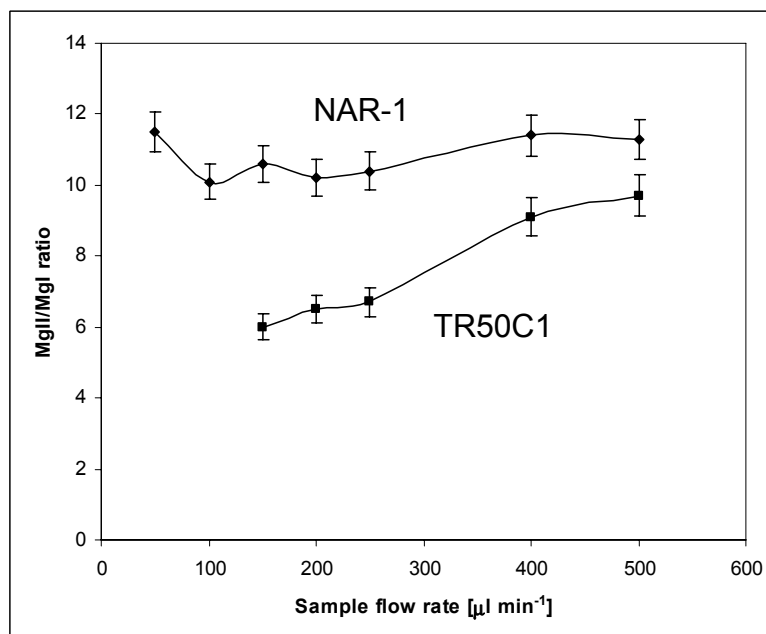

Fig. 4. The effect of sample flow rate on MgII/MgI ratio for ICP-OES systems with NAR-1 and CN (a – for Integra XL; b – for JY 138).

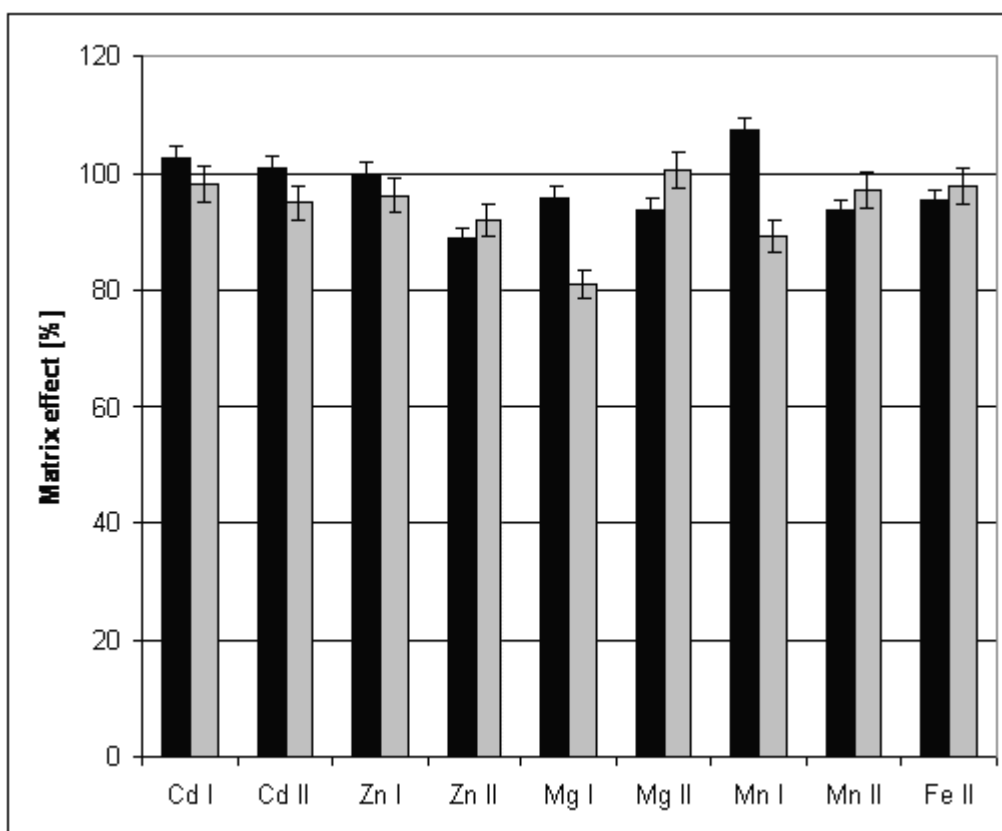

Fig. 5. The matrix effect from nitric acid on emission intensity of some metals by the Integra XL ICP-OES system with solution nebulization using NAR-1 and CCN

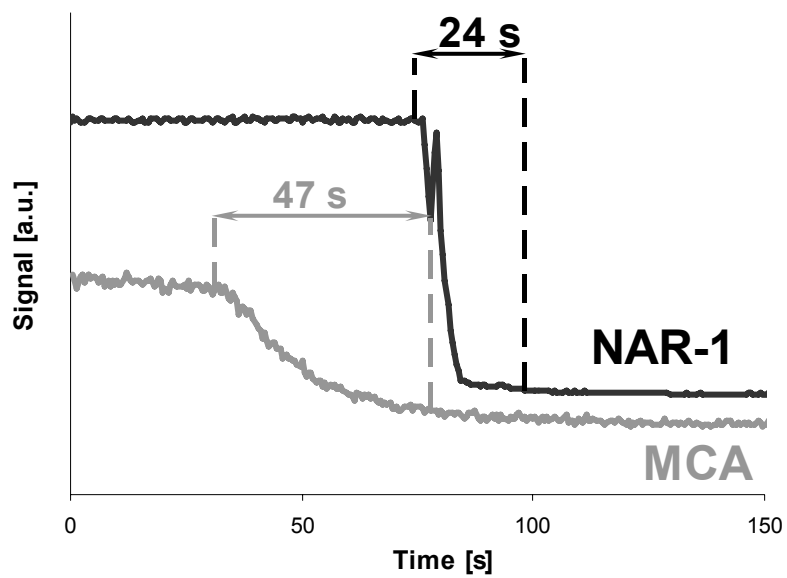

Fig. 6. The comparison of wash-out times for Zn for NAR-1 and MCA nebulizers at  $0.15 \text{ ml min}^{-1}$  of sample flow rate and  $400 \text{ ml min}^{-1}$  of nebulizer gas flow rate by MIP-OES
